# Supplementary material
Source: PubMed Central journal article supplement (PMC3416603)
Supplement: AEM.01492-12_zam999103617so1.pdf [file AEM.01492-12_zam999103617so1.pdf]

# Supplemental Information

## Molecular Survey of Occurrence of *Legionella* spp., *Mycobacterium* spp., *Pseudomonas aeruginosa* and Amoeba Hosts in Two Chloraminated Drinking Water Distribution Systems

Hong Wang<sup>1</sup>, Marc A. Edwards<sup>1</sup>, Joseph O. Falkinham, III<sup>2</sup>, and A. Pruden<sup>1#</sup>

<sup>1</sup> Via Department of Civil & Environmental Engineering, 418 Durham Hall, Blacksburg, VA 24061, U.S.A.

<sup>2</sup> Department of Biological Science, Virginia Tech, Blacksburg, VA 24061, U.S.A.

**#Corresponding author:** Associate Professor, Department of Civil and Environmental Engineering, Virginia Tech, Blacksburg VA, 24061 U.S.A.

Phone: (540) 231-3980

Fax: (540) 231-7810

Email: [apruden@vt.edu](mailto:apruden@vt.edu)

### Contents:

|                                                                                                                                                       |          |
|-------------------------------------------------------------------------------------------------------------------------------------------------------|----------|
| Table S1. qPCR primers, probes, and assay conditions used in this study.....                                                                          | p. 2     |
| Supplemental Methods A: q-PCR specificity validation using drinking water samples .....                                                               | p. 4     |
| Table S2. Blast results for <i>Legionella</i> spp. q-PCR assay.....                                                                                   | p. 4     |
| Table S3. Blast results for <i>L. pneumophila</i> q-PCR assay.....                                                                                    | p. 6     |
| Table S4. Blast results for <i>Acanthamoeba</i> spp. q-PCR assay.....                                                                                 | p. 9     |
| Table S5. Blast results for <i>Mycobacterium</i> spp. q-PCR.....                                                                                      | p. 11    |
| Table S6. Blast results for <i>H. vermiformis</i> q-PCR.....                                                                                          | p. 13    |
| Table S7. Blast results for <i>P. aeruginosa</i> q-PCR.....                                                                                           | p. 15    |
| Table S8. Blast results for <i>M. avium</i> q-PCR.....                                                                                                | p. 18    |
| Supplemental Methods B: Comparison of culture versus qPCR.....                                                                                        | p. 20    |
| Figure S1. Enumeration of microbial targets in serial dilutions via culturing versus qPCR.....                                                        | p. 20-21 |
| Table S9. Regression analysis of q-PCR and culturing data.....                                                                                        | p. 21    |
| Figure S2. Multi-dimensional scaling analysis of bacterial community composition (T-RFLP profiles) for samples from BCV with different water age..... | p. 22    |
| Supplemental References.....                                                                                                                          | p. 22    |

**Table S1 qPCR primers, probes, and assay conditions used in this study**

| Targeted organisms        | Targeted genes | Sequences (5'-3')                                                                                              | Program                                    |                                                               |     | Amplicon (bp) | Reference |
|---------------------------|----------------|----------------------------------------------------------------------------------------------------------------|--------------------------------------------|---------------------------------------------------------------|-----|---------------|-----------|
|                           |                |                                                                                                                | Initial denaturation and enzyme activation | Denaturing / Annealing / Extension                            |     |               |           |
| <i>Legionella spp.</i>    | 23S rRNA       | Leg23SF: CCCATGAAGCCCGTTGAA<br>Leg23SR: ACAATCAGCCAATTAGTACGAGTTAGC<br>Probe: HEX-TCCACACCTCGCCTATCAACGTCGTAGT | 95 °C for 2 min                            | 40 cycles of 95 °C for 5 s and 58.5 °C for 10 s               | 92  | (3)           |           |
| <i>L. pneumophila</i>     | <i>mip</i>     | LmipF: AAAGGCATGCAAGACGCTATG<br>LmipR: GAAACTTGTTAAGAACGTCTTTCATTTG<br>Probe: FAM-TGGCGCTCAATTGGCTTTAACCGA     | 95 °C for 2 min                            | 40 cycles of 95 °C for 5 s and 60 °C for 10 s                 | 78  | (3)           |           |
| <i>Mycobacterium spp.</i> | 16S rRNA       | 110F: CCTGGGAAACTGGGTCTAAT<br>I571R: CGCACGCTCACAGTTA<br>H19R: FAM-TTTCACGAACAACGCGACAAACT                     | 95 °C for 2 min                            | 45 cycles of 95 °C for 5 s, 55 °C for 15 s and 72 °C for 10 s | 462 | (4)           |           |
| <i>M. avium</i>           | 16S rRNA       | MycavF: AGAGTTTGATCCTGGCTCAG<br>MycavR: ACCAGAAGACATGCGTCTTG                                                   | 98 °C for 2 min                            | 40 cycles of 98 °C for 5 s and 68 °C for 18 s                 | 180 | (7)           |           |
| <i>H. vermiformis</i>     | 18S rRNA       | Hv1227F: TTACGAGGTCAGGACACTGT<br>Hv1728R: GACCATCCGGAGTTCTCG                                                   | 98 °C for 2 min                            | 40 cycles of 98 °C for 5 s and 72 °C for 18 s                 | 502 | (2)           |           |
| <i>Acanthamoeba spp.</i>  | 18S rRNA       | TaqAcF1: CGACCAGCGATTAGGAGACG<br>TaqAcR1: CCGACGCCAAGGACGAC<br>Probe:                                          | 95 °C for 2 min                            | 40 cycles of 95 °C for 5 s and 60 °C for 10 s                 | 66  | (5)           |           |

|                                      |                                 |                                        |                    |                                                     |                                               |     |
|--------------------------------------|---------------------------------|----------------------------------------|--------------------|-----------------------------------------------------|-----------------------------------------------|-----|
| <b><i>P. aeruginosa</i></b>          | <i>ecfX</i><br>&<br><i>gyrB</i> | FAM-TGAATACAAAACACCACCATCGGCGC         | 95 °C for 2<br>min | 50 cycles of 95<br>°C for 5 s and<br>60 °C for 10 s | 63 ( <i>ecfX</i> )<br><br>220 ( <i>gyrB</i> ) | (1) |
|                                      |                                 | <i>ecfX</i> -F: CGCATGCCTATCAGGCGTT    |                    |                                                     |                                               |     |
|                                      |                                 | <i>ecfX</i> -R: GAACTGCCCAGGTGCTTGC    |                    |                                                     |                                               |     |
|                                      |                                 | Probe: HEX-ATGGCGAGTTGCTGCGCTTCCT      |                    |                                                     |                                               |     |
|                                      |                                 | <i>gyrB</i> -F: CCTGACCATCCGTCGCCACAAC |                    |                                                     |                                               |     |
| <i>gyrB</i> -R: CGCAGCAGGATGCCGACGCC |                                 |                                        |                    |                                                     |                                               |     |
|                                      |                                 | Probe:                                 |                    |                                                     |                                               |     |
|                                      |                                 | FAM-CCGTGGTGGTAGACCTGTTCCCAGACC        |                    |                                                     |                                               |     |
| <b>Total Bacteria</b>                | 16S rRNA                        | BACT1369F: CGGTGAATACGTTTCYCGG         | 98 °C for 2<br>min | 40 cycles of 98<br>°C for 5 s and<br>55 °C for 5 s  | 124                                           | (6) |
|                                      |                                 | PROK: GGWTACCTTGTTACGACTT              |                    |                                                     |                                               |     |

---

## q-PCR specificity validation using drinking water samples

DNA amplicons obtained from each q-PCR amplification were cloned to TOPO® TA cloning® kit for sequencing (Invitrogen, Carlsbad, CA) according to manufacturer's protocol. Inserts were amplified from each clone using vector-specific primer M13F and M13R. Only M13 PCR products with insert length >100 bp were visualized on a 2% agarose gel using a Molecular Image® ChemiDoc™ XRS system (Bio-Rad, CA) to eliminate clones without inserts prior to sequencing. M13 PCR products with insert length ≤100 bp were sequenced without evaluating insert presence. Sequences of M13 amplicons were analyzed using the NCBI Basic Local Alignment Search Tool (BLAST).

**Table S2 Blast results for *Legionella* spp. q-PCR assay**

| Sample | bp    | %  | gap | Acc #                      | Highest similarity                                                                                            |
|--------|-------|----|-----|----------------------------|---------------------------------------------------------------------------------------------------------------|
| C1     | 90/91 | 99 | 0   | <a href="#">CP003192.1</a> | <i>Legionella pneumophila</i> subsp. <i>pneumophila</i> ATCC 43290 ( <a href="#">rRNA-23S ribosomal RNA</a> ) |
| C2     | 90/91 | 99 | 0   | <a href="#">CP003192.1</a> | <i>Legionella pneumophila</i> subsp. <i>pneumophila</i> ATCC 43290 ( <a href="#">rRNA-23S ribosomal RNA</a> ) |
| C3     | 90/91 | 99 | 0   | <a href="#">CP003192.1</a> | <i>Legionella pneumophila</i> subsp. <i>pneumophila</i> ATCC 43290 ( <a href="#">rRNA-23S ribosomal RNA</a> ) |
| C4     | 90/91 | 99 | 0   | <a href="#">CP003192.1</a> | <i>Legionella pneumophila</i> subsp. <i>pneumophila</i> ATCC 43290 ( <a href="#">rRNA-23S ribosomal RNA</a> ) |
| C5     | 90/91 | 99 | 0   | <a href="#">CP003192.1</a> | <i>Legionella pneumophila</i> subsp. <i>pneumophila</i> ATCC 43290 ( <a href="#">rRNA-23S ribosomal RNA</a> ) |
| C6     | 90/91 | 99 | 0   | <a href="#">CP003192.1</a> | <i>Legionella pneumophila</i> subsp. <i>pneumophila</i> ATCC 43290 ( <a href="#">rRNA-23S ribosomal RNA</a> ) |
| C7     | 90/91 | 99 | 0   | <a href="#">CP003192.1</a> | <i>Legionella pneumophila</i> subsp. <i>pneumophila</i> ATCC 43290 ( <a href="#">rRNA-23S ribosomal RNA</a> ) |
| C8     | 90/91 | 99 | 0   | <a href="#">CP003192.1</a> | <i>Legionella pneumophila</i> subsp. <i>pneumophila</i> ATCC 43290 ( <a href="#">rRNA-23S ribosomal RNA</a> ) |
| C9     | 90/91 | 99 | 0   | <a href="#">CP003192.1</a> | <i>Legionella pneumophila</i> subsp. <i>pneumophila</i> ATCC 43290 ( <a href="#">rRNA-23S ribosomal RNA</a> ) |
| C10    | 90/91 | 99 | 0   | <a href="#">CP003192.1</a> | <i>Legionella pneumophila</i> subsp. <i>pneumophila</i> ATCC 43290 ( <a href="#">rRNA-23S ribosomal RNA</a> ) |

|     |       |    |   |                            |                                                                                                               |
|-----|-------|----|---|----------------------------|---------------------------------------------------------------------------------------------------------------|
| C11 | 90/91 | 99 | 0 | <a href="#">CP003192.1</a> | <i>Legionella pneumophila</i> subsp. <i>pneumophila</i> ATCC 43290 ( <a href="#">rRNA-23S ribosomal RNA</a> ) |
| C12 | 90/91 | 99 | 0 | <a href="#">CP003192.1</a> | <i>Legionella pneumophila</i> subsp. <i>pneumophila</i> ATCC 43290 ( <a href="#">rRNA-23S ribosomal RNA</a> ) |
| C13 | 90/91 | 99 | 0 | <a href="#">CP003192.1</a> | <i>Legionella pneumophila</i> subsp. <i>pneumophila</i> ATCC 43290 ( <a href="#">rRNA-23S ribosomal RNA</a> ) |
| C15 | 83/92 | 90 | 4 | <a href="#">Z30458.1</a>   | <i>L.rubrilucens</i> WA-270A-C2 genes for 23S ribosomal RNA and 5S ribosomal RNA                              |
| C16 | 90/91 | 99 | 0 | <a href="#">CP003192.1</a> | <i>Legionella pneumophila</i> subsp. <i>pneumophila</i> ATCC 43290 ( <a href="#">rRNA-23S ribosomal RNA</a> ) |
| C17 | 90/91 | 99 | 0 | <a href="#">CP003192.1</a> | <i>Legionella pneumophila</i> subsp. <i>pneumophila</i> ATCC 43290 ( <a href="#">rRNA-23S ribosomal RNA</a> ) |
| C18 | 90/91 | 99 | 0 | <a href="#">CP003192.1</a> | <i>Legionella pneumophila</i> subsp. <i>pneumophila</i> ATCC 43290 ( <a href="#">rRNA-23S ribosomal RNA</a> ) |
| C19 | 90/91 | 99 | 0 | <a href="#">CP003192.1</a> | <i>Legionella pneumophila</i> subsp. <i>pneumophila</i> ATCC 43290 ( <a href="#">rRNA-23S ribosomal RNA</a> ) |
| C20 | 90/91 | 99 | 0 | <a href="#">CP003192.1</a> | <i>Legionella pneumophila</i> subsp. <i>pneumophila</i> ATCC 43290 ( <a href="#">rRNA-23S ribosomal RNA</a> ) |
| C21 | 90/91 | 99 | 0 | <a href="#">CP003192.1</a> | <i>Legionella pneumophila</i> subsp. <i>pneumophila</i> ATCC 43290 ( <a href="#">rRNA-23S ribosomal RNA</a> ) |
| C23 | 90/91 | 99 | 0 | <a href="#">CP003192.1</a> | <i>Legionella pneumophila</i> subsp. <i>pneumophila</i> ATCC 43290 ( <a href="#">rRNA-23S ribosomal RNA</a> ) |
| C24 | 90/91 | 99 | 0 | <a href="#">CP003192.1</a> | <i>Legionella pneumophila</i> subsp. <i>pneumophila</i> ATCC 43290 ( <a href="#">rRNA-23S ribosomal RNA</a> ) |
| C25 | 90/91 | 99 | 0 | <a href="#">CP003192.1</a> | <i>Legionella pneumophila</i> subsp. <i>pneumophila</i> ATCC 43290 ( <a href="#">rRNA-23S ribosomal RNA</a> ) |

Note: Sequencing of C14 and C22 failed.

**Table S3 Blast results for *L. pneumophila* q-PCR assay**

| Sample | bp    | %  | gap | Acc #                      | Highest similarity                                                                                                                        |
|--------|-------|----|-----|----------------------------|-------------------------------------------------------------------------------------------------------------------------------------------|
| C26    | 77/78 | 99 | 1   | <a href="#">JN697590.1</a> | <i>Legionella pneumophila</i><br>culture-collection DMST:24600<br>macrophage infectivity potentiator ( <i>mip</i> )<br>gene, complete cds |
| C27    | 77/78 | 99 | 1   | <a href="#">JN697590.1</a> | <i>Legionella pneumophila</i><br>culture-collection DMST:24600<br>macrophage infectivity potentiator ( <i>mip</i> )<br>gene, complete cds |
| C28    | 77/78 | 99 | 1   | <a href="#">JN697590.1</a> | <i>Legionella pneumophila</i><br>culture-collection DMST:24600<br>macrophage infectivity potentiator ( <i>mip</i> )<br>gene, complete cds |
| C29    | 77/78 | 99 | 1   | <a href="#">JN697590.1</a> | <i>Legionella pneumophila</i><br>culture-collection DMST:24600<br>macrophage infectivity potentiator ( <i>mip</i> )<br>gene, complete cds |
| C30    | 77/78 | 99 | 1   | <a href="#">JN697590.1</a> | <i>Legionella pneumophila</i><br>culture-collection DMST:24600<br>macrophage infectivity potentiator ( <i>mip</i> )<br>gene, complete cds |
| C31    | 76/78 | 97 | 1   | <a href="#">JN697588.1</a> | <i>Legionella pneumophila</i><br>culture-collection DMST:17221<br>macrophage infectivity potentiator ( <i>mip</i> )<br>gene, complete cds |
| C32    | 77/78 | 99 | 1   | <a href="#">JN697590.1</a> | <i>Legionella pneumophila</i><br>culture-collection DMST:24600<br>macrophage infectivity potentiator ( <i>mip</i> )<br>gene, complete cds |
| C33    | 77/78 | 99 | 1   | <a href="#">JN697590.1</a> | <i>Legionella pneumophila</i><br>culture-collection DMST:24600<br>macrophage infectivity potentiator ( <i>mip</i> )<br>gene, complete cds |
| C34    | 77/78 | 99 | 1   | <a href="#">JN697590.1</a> | <i>Legionella pneumophila</i><br>culture-collection DMST:24600<br>macrophage infectivity potentiator ( <i>mip</i> )<br>gene, complete cds |
| C35    | 77/78 | 99 | 1   | <a href="#">JN697590.1</a> | <i>Legionella pneumophila</i><br>culture-collection DMST:24600<br>macrophage infectivity potentiator ( <i>mip</i> )<br>gene, complete cds |

|     |       |    |   |                            |                                                                                                                                           |
|-----|-------|----|---|----------------------------|-------------------------------------------------------------------------------------------------------------------------------------------|
| C36 | 77/78 | 99 | 1 | <a href="#">JN697590.1</a> | <i>Legionella pneumophila</i><br>culture-collection DMST:24600<br>macrophage infectivity potentiator ( <i>mip</i> )<br>gene, complete cds |
| C37 | 77/78 | 99 | 1 | <a href="#">JN697590.1</a> | <i>Legionella pneumophila</i><br>culture-collection DMST:24600<br>macrophage infectivity potentiator ( <i>mip</i> )<br>gene, complete cds |
| C38 | 77/78 | 99 | 1 | <a href="#">JN697590.1</a> | <i>Legionella pneumophila</i><br>culture-collection DMST:24600<br>macrophage infectivity potentiator ( <i>mip</i> )<br>gene, complete cds |
| C39 | 77/78 | 99 | 1 | <a href="#">JN697590.1</a> | <i>Legionella pneumophila</i><br>culture-collection DMST:24600<br>macrophage infectivity potentiator ( <i>mip</i> )<br>gene, complete cds |
| C40 | 77/78 | 99 | 1 | <a href="#">JN697590.1</a> | <i>Legionella pneumophila</i><br>culture-collection DMST:24600<br>macrophage infectivity potentiator ( <i>mip</i> )<br>gene, complete cds |
| C41 | 77/78 | 99 | 1 | <a href="#">JN697590.1</a> | <i>Legionella pneumophila</i><br>culture-collection DMST:24600<br>macrophage infectivity potentiator ( <i>mip</i> )<br>gene, complete cds |
| C42 | 77/78 | 99 | 1 | <a href="#">JN697590.1</a> | <i>Legionella pneumophila</i><br>culture-collection DMST:24600<br>macrophage infectivity potentiator ( <i>mip</i> )<br>gene, complete cds |
| C43 | 76/78 | 97 | 1 | <a href="#">JN697590.1</a> | <i>Legionella pneumophila</i><br>culture-collection DMST:24600<br>macrophage infectivity potentiator ( <i>mip</i> )<br>gene, complete cds |
| C44 | 77/78 | 99 | 1 | <a href="#">JN697590.1</a> | <i>Legionella pneumophila</i><br>culture-collection DMST:24600<br>macrophage infectivity potentiator ( <i>mip</i> )<br>gene, complete cds |
| C45 | 77/78 | 99 | 1 | <a href="#">JN697590.1</a> | <i>Legionella pneumophila</i><br>culture-collection DMST:24600<br>macrophage infectivity potentiator ( <i>mip</i> )<br>gene, complete cds |
| C46 | 77/78 | 99 | 1 | <a href="#">JN697590.1</a> | <i>Legionella pneumophila</i><br>culture-collection DMST:24600<br>macrophage infectivity potentiator ( <i>mip</i> )<br>gene, complete cds |

|     |       |    |   |                            |                                                                                                                                           |
|-----|-------|----|---|----------------------------|-------------------------------------------------------------------------------------------------------------------------------------------|
| C47 | 77/78 | 99 | 1 | <a href="#">JN697590.1</a> | <i>Legionella pneumophila</i><br>culture-collection DMST:24600<br>macrophage infectivity potentiator ( <i>mip</i> )<br>gene, complete cds |
| C48 | 77/78 | 99 | 1 | <a href="#">JN697590.1</a> | <i>Legionella pneumophila</i><br>culture-collection DMST:24600<br>macrophage infectivity potentiator ( <i>mip</i> )<br>gene, complete cds |
| C49 | 77/78 | 99 | 1 | <a href="#">JN697590.1</a> | <i>Legionella pneumophila</i><br>culture-collection DMST:24600<br>macrophage infectivity potentiator ( <i>mip</i> )<br>gene, complete cds |
| C50 | 77/78 | 99 | 1 | <a href="#">JN697590.1</a> | <i>Legionella pneumophila</i><br>culture-collection DMST:24600<br>macrophage infectivity potentiator ( <i>mip</i> )<br>gene, complete cds |



**Table S4 Blast results for *Acanthamoeba* spp. q-PCR assay**

| Sample | bp      | %   | gap | Acc #                      | Highest similarity                                                                     |
|--------|---------|-----|-----|----------------------------|----------------------------------------------------------------------------------------|
| C51    | 63/63   | 100 | 0   | <a href="#">FJ042636.1</a> | <i>Acanthamoeba</i> sp. Had_008 18S ribosomal RNA gene, partial sequence<br>Length=425 |
| C52    | 64/64   | 100 | 0   | <a href="#">FJ042636.1</a> | <i>Acanthamoeba</i> sp. Had_008 18S ribosomal RNA gene, partial sequence<br>Length=425 |
| C53    | 229/239 | 96  | 0   | <a href="#">BA000040.2</a> | <i>Bradyrhizobium japonicum</i> USDA 110 DNA, complete genome                          |
| C54    |         |     |     |                            | No match                                                                               |
| C55    | 63/63   | 100 | 0   | <a href="#">FJ042636.1</a> | <i>Acanthamoeba</i> sp. Had_008 18S ribosomal RNA gene, partial sequence<br>Length=425 |
| C56    | 63/63   | 100 | 0   | <a href="#">FJ042636.1</a> | <i>Acanthamoeba</i> sp. Had_008 18S ribosomal RNA gene, partial sequence<br>Length=425 |
| C57    | 64/64   | 100 | 0   | <a href="#">FJ042636.1</a> | <i>Acanthamoeba</i> sp. Had_008 18S ribosomal RNA gene, partial sequence<br>Length=425 |
| C58    | 63/63   | 100 | 0   | <a href="#">FJ042636.1</a> | <i>Acanthamoeba</i> sp. Had_008 18S ribosomal RNA gene, partial sequence<br>Length=425 |
| C59    | 63/63   | 100 | 0   | <a href="#">FJ042636.1</a> | <i>Acanthamoeba</i> sp. Had_008 18S ribosomal RNA gene, partial sequence<br>Length=425 |
| C60    | 63/63   | 100 | 0   | <a href="#">FJ042636.1</a> | <i>Acanthamoeba</i> sp. Had_008 18S ribosomal RNA gene, partial sequence<br>Length=425 |
| C61    | 63/63   | 100 | 0   | <a href="#">FJ042636.1</a> | <i>Acanthamoeba</i> sp. Had_008 18S ribosomal RNA gene, partial sequence<br>Length=425 |
| C62    | 62/63   | 98  | 0   | <a href="#">FJ042636.1</a> | <i>Acanthamoeba</i> sp. Had_008 18S ribosomal RNA gene, partial sequence<br>Length=425 |
| C63    | 65/65   | 100 | 0   | <a href="#">JQ408990.1</a> | <i>Acanthamoeba</i> sp. A-T4-3-146 18S ribosomal RNA gene, partial sequence            |
| C64    | 64/65   | 98  | 1   | <a href="#">JQ408990.1</a> | <i>Acanthamoeba</i> sp. A-T4-3-146 18S ribosomal RNA gene, partial sequence            |
| C65    | 60/64   | 94  | 1   | <a href="#">FJ042636.1</a> | <i>Acanthamoeba</i> sp. Had_008 18S ribosomal RNA gene, partial sequence<br>Length=425 |

|     |         |    |   |                            |                                                                                  |
|-----|---------|----|---|----------------------------|----------------------------------------------------------------------------------|
| C68 | 62/65   | 95 | 2 | <a href="#">JQ408985.1</a> | <i>Acanthamoeba</i> sp. A-T4-1-89 18S ribosomal RNA gene, partial sequence       |
| C69 | 63/64   | 98 | 1 | <a href="#">JQ031557.1</a> | <i>Acanthamoeba</i> sp. AcaKM01 18S ribosomal RNA gene, partial sequence         |
| C70 | 121/125 | 97 | 0 | <a href="#">AP012280.1</a> | <i>Pseudomonas aeruginosa</i> NCGM2.S1 DNA, <a href="#">two-component sensor</a> |
| C71 | 63/64   | 98 | 1 | <a href="#">JQ031557.1</a> | <i>Acanthamoeba</i> sp. AcaKM01 18S ribosomal RNA gene, partial sequence         |
| C72 | 64/65   | 98 | 1 | <a href="#">JQ408990.1</a> | <i>Acanthamoeba</i> sp. A-T4-3-146 18S ribosomal RNA gene, partial sequence      |
| C73 |         |    |   |                            | No match                                                                         |
| C74 | 63/64   | 98 | 1 | <a href="#">JQ268236.1</a> | <i>Acanthamoeba</i> sp. P4 18S ribosomal RNA gene, partial sequence              |
| C75 | 63/64   | 98 | 1 | <a href="#">JQ031557.1</a> | <i>Acanthamoeba</i> sp. AcaKM01 18S ribosomal RNA gene, partial sequence         |
| C76 | 63/64   | 98 | 1 | <a href="#">JQ031557.1</a> | <i>Acanthamoeba</i> sp. AcaKM01 18S ribosomal RNA gene, partial sequence         |
| C77 | 64/65   | 98 | 1 | <a href="#">JQ031557.1</a> | <i>Acanthamoeba</i> sp. AcaKM01 18S ribosomal RNA gene, partial sequence         |
| C78 | 62/64   | 97 | 1 | <a href="#">JQ268236.1</a> | <i>Acanthamoeba</i> sp. P4 18S ribosomal RNA gene, partial sequence              |

Note: Sequencing of C66 and C67 failed. M13 PCR products of C53, C54, C70, C73 can't be amplified using *Acanthamoeba* spp. q-PCR (with a probe).

**Table S5 Blast results for *Mycobacterium* spp. q-PCR**

| Sample | bp      | %  | gap | Acc #                       | Highest similarity                                                    |
|--------|---------|----|-----|-----------------------------|-----------------------------------------------------------------------|
| C91    | 460/464 | 99 | 2   | <a href="#">NR_042919.1</a> | <i>Mycobacterium mucogenicum</i> strain ATCC 49650 16S ribosomal RNA  |
| C92    | 452/462 | 98 | 2   | <a href="#">NR_043002.1</a> | <i>Mycobacterium massiliense</i> strain CCUG 48898 16S ribosomal RNA  |
| C93    | 460/464 | 99 | 2   | <a href="#">NR_042919.1</a> | <i>Mycobacterium mucogenicum</i> strain ATCC 49650 16S ribosomal RNA  |
| C94    | 467/477 | 98 | 0   | <a href="#">NR_043588.1</a> | <i>Mycobacterium arupense</i> strain AR30097 16S ribosomal RNA        |
| C95    | 460/464 | 99 | 2   | <a href="#">NR_042919.1</a> | <i>Mycobacterium mucogenicum</i> strain ATCC 49650 16S ribosomal RNA  |
| C96    | 455/462 | 98 | 1   | <a href="#">NR_042280.1</a> | <i>Mycobacterium llatzerense</i> strain : MG13 16S ribosomal RNA      |
| C97    | 460/463 | 99 | 1   | <a href="#">NR_042919.1</a> | <i>Mycobacterium mucogenicum</i> strain ATCC 49650 16S ribosomal RNA  |
| C98    | 458/462 | 99 | 1   | <a href="#">NR_042919.1</a> | <i>Mycobacterium mucogenicum</i> strain ATCC 49650 16S ribosomal RNA  |
| C99    | 456/462 | 99 | 1   | <a href="#">NR_042280.1</a> | <i>Mycobacterium llatzerense</i> strain : MG13 16S ribosomal RNA      |
| C100   | 470/477 | 99 | 1   | <a href="#">NR_043588.1</a> | <i>Mycobacterium arupense</i> strain AR30097 16S ribosomal RNA        |
| C101   | 461/463 | 99 | 0   | <a href="#">NR_042919.1</a> | <i>Mycobacterium mucogenicum</i> strain ATCC 49650 16S ribosomal RNA  |
| C102   | 457/463 | 99 | 0   | <a href="#">NR_042923.1</a> | <i>Mycobacterium farcinogenes</i> strain NCTC 10955 16S ribosomal RNA |
| C103   | 459/463 | 99 | 0   | <a href="#">NR_042919.1</a> | <i>Mycobacterium mucogenicum</i> strain ATCC 49650 16S ribosomal RNA  |
| C104   | 463/470 | 99 | 2   | <a href="#">NR_042919.1</a> | <i>Mycobacterium mucogenicum</i> strain ATCC 49650 16S ribosomal RNA  |
| C105   | 465/470 | 99 | 2   | <a href="#">NR_042919.1</a> | <i>Mycobacterium mucogenicum</i> strain ATCC 49650 16S ribosomal RNA  |
| C106   | 459/463 | 99 | 0   | <a href="#">NR_042919.1</a> | <i>Mycobacterium mucogenicum</i> strain ATCC 49650 16S ribosomal RNA  |
| C107   | 457/462 | 99 | 1   | <a href="#">NR_042919.1</a> | <i>Mycobacterium mucogenicum</i> strain ATCC 49650 16S ribosomal RNA  |
| C108   | 470/476 | 99 | 1   | <a href="#">NR_043588.1</a> | <i>Mycobacterium arupense</i> strain AR30097 16S ribosomal RNA        |
| C109   | 460/463 | 99 | 1   | <a href="#">NR_042919.1</a> | <i>Mycobacterium mucogenicum</i> strain ATCC 49650 16S ribosomal RNA  |
| C111   | 454/462 | 98 | 1   | <a href="#">NR_042919.1</a> | <i>Mycobacterium mucogenicum</i> strain ATCC 49650 16S ribosomal RNA  |

|      |         |    |   |                             |                                                                       |
|------|---------|----|---|-----------------------------|-----------------------------------------------------------------------|
| C112 | 460/462 | 99 | 1 | <a href="#">NR_042919.1</a> | <i>Mycobacterium mucogenicum</i> strain ATCC 49650 16S ribosomal RNA  |
| C113 | 456/462 | 99 | 1 | <a href="#">NR_042280.1</a> | <i>Mycobacterium llatzerense</i> strain : MG13 16S ribosomal RNA      |
| C114 | 459/463 | 99 | 1 | <a href="#">NR_042923.1</a> | <i>Mycobacterium farcinogenes</i> strain NCTC 10955 16S ribosomal RNA |
| C115 | 468/476 | 98 | 1 | <a href="#">NR_043588.1</a> | <i>Mycobacterium arupense</i> strain AR30097 16S ribosomal RNA        |
| C116 | 466/477 | 98 | 1 | <a href="#">NR_043588.1</a> | <i>Mycobacterium arupense</i> strain AR30097 16S ribosomal RNA        |
| C117 | 466/477 | 98 | 1 | <a href="#">NR_043588.1</a> | <i>Mycobacterium arupense</i> strain AR30097 16S ribosomal RNA        |

Note: Sequencing of C110 and C118 failed

**Table S6 Blast results for *H. vermiformis* q-PCR**

| Sample | bp      | %  | gap | Acc #                      | Highest similarity                                                                                |
|--------|---------|----|-----|----------------------------|---------------------------------------------------------------------------------------------------|
| C119   | 497/502 | 99 | 0   | <a href="#">DQ407609.1</a> | <i>Hartmannella vermiformis</i> isolate CT8.4<br>18S ribosomal RNA gene gene, partial<br>sequence |
| C124   | 500/502 | 99 | 0   | <a href="#">DQ407609.1</a> | <i>Hartmannella vermiformis</i> isolate CT8.4<br>18S ribosomal RNA gene gene, partial<br>sequence |
| C125   | 501/502 | 99 | 0   | <a href="#">DQ407609.1</a> | <i>Hartmannella vermiformis</i> isolate CT8.4<br>18S ribosomal RNA gene gene, partial<br>sequence |
| C128   | 500/502 | 99 | 0   | <a href="#">DQ407609.1</a> | <i>Hartmannella vermiformis</i> isolate CT8.4<br>18S ribosomal RNA gene gene, partial<br>sequence |
| C129   | 500/502 | 99 | 0   | <a href="#">DQ407609.1</a> | <i>Hartmannella vermiformis</i> isolate CT8.4<br>18S ribosomal RNA gene gene, partial<br>sequence |
| C130   | 500/502 | 99 | 0   | <a href="#">DQ407609.1</a> | <i>Hartmannella vermiformis</i> isolate CT8.4<br>18S ribosomal RNA gene gene, partial<br>sequence |
| C131   | 498/502 | 99 | 0   | <a href="#">DQ407609.1</a> | <i>Hartmannella vermiformis</i> isolate CT8.4<br>18S ribosomal RNA gene gene, partial<br>sequence |
| C132   | 498/502 | 99 | 0   | <a href="#">DQ407609.1</a> | <i>Hartmannella vermiformis</i> isolate CT8.4<br>18S ribosomal RNA gene gene, partial<br>sequence |
| C133   | 501/502 | 99 | 0   | <a href="#">DQ407609.1</a> | <i>Hartmannella vermiformis</i> isolate CT8.4<br>18S ribosomal RNA gene gene, partial<br>sequence |
| C134   | 501/502 | 99 | 0   | <a href="#">DQ407609.1</a> | <i>Hartmannella vermiformis</i> isolate CT8.4<br>18S ribosomal RNA gene gene, partial<br>sequence |
| C135   | 498/499 | 99 | 0   | <a href="#">DQ407609.1</a> | <i>Hartmannella vermiformis</i> isolate CT8.4<br>18S ribosomal RNA gene gene, partial<br>sequence |
| C136   | 497/502 | 99 | 0   | <a href="#">DQ407609.1</a> | <i>Hartmannella vermiformis</i> isolate CT8.4<br>18S ribosomal RNA gene gene, partial<br>sequence |
| C137   | 496/502 | 99 | 0   | <a href="#">DQ407609.1</a> | <i>Hartmannella vermiformis</i> isolate CT8.4<br>18S ribosomal RNA gene gene, partial<br>sequence |
| C138   | 496/502 | 99 | 0   | <a href="#">DQ407609.1</a> | <i>Hartmannella vermiformis</i> isolate CT8.4<br>18S ribosomal RNA gene gene, partial<br>sequence |

|      |         |    |   |                            | sequence                                                                                          |
|------|---------|----|---|----------------------------|---------------------------------------------------------------------------------------------------|
| C139 | 498/499 | 99 | 0 | <a href="#">DQ407609.1</a> | <i>Hartmannella vermiformis</i> isolate CT8.4<br>18S ribosomal RNA gene gene, partial<br>sequence |
| C140 | 501/502 | 99 | 0 | <a href="#">DQ407609.1</a> | <i>Hartmannella vermiformis</i> isolate CT8.4<br>18S ribosomal RNA gene gene, partial<br>sequence |
| C141 | 497/499 | 99 | 0 | <a href="#">DQ407609.1</a> | <i>Hartmannella vermiformis</i> isolate CT8.4<br>18S ribosomal RNA gene gene, partial<br>sequence |
| C142 | 501/502 | 99 | 0 | <a href="#">DQ407609.1</a> | <i>Hartmannella vermiformis</i> isolate CT8.4<br>18S ribosomal RNA gene gene, partial<br>sequence |
| C143 | 500/502 | 99 | 0 | <a href="#">DQ407609.1</a> | <i>Hartmannella vermiformis</i> isolate CT8.4<br>18S ribosomal RNA gene gene, partial<br>sequence |
| C144 | 492/499 | 99 | 0 | <a href="#">DQ407609.1</a> | <i>Hartmannella vermiformis</i> isolate CT8.4<br>18S ribosomal RNA gene gene, partial<br>sequence |

Note: Sequencing of C120, C121, C122, C123, C126, C127 failed.

**Table S7 Blast results for *P. aeruginosa* q-PCR**

| Sample | bp    | %   | gap | Acc #                      | Highest similarity                                                                                          |
|--------|-------|-----|-----|----------------------------|-------------------------------------------------------------------------------------------------------------|
| ecf1   | 62/63 | 98  | 1   | <a href="#">AP012280.1</a> | <i>Pseudomonas aeruginosa</i> NCGM2.S1<br>DNA, <a href="#">RNA polymerase ECF-subfamily sigma-70 factor</a> |
| ecf2   | 63/63 | 100 | 0   | <a href="#">AP012280.1</a> | <i>Pseudomonas aeruginosa</i> NCGM2.S1<br>DNA, <a href="#">RNA polymerase ECF-subfamily sigma-70 factor</a> |
| ecf3   | 56/56 | 100 | 0   | <a href="#">AP012280.1</a> | <i>Pseudomonas aeruginosa</i> NCGM2.S1<br>DNA, <a href="#">RNA polymerase ECF-subfamily sigma-70 factor</a> |
| ecf4   | 65/65 | 100 | 0   | <a href="#">AP012280.1</a> | <i>Pseudomonas aeruginosa</i> NCGM2.S1<br>DNA, <a href="#">RNA polymerase ECF-subfamily sigma-70 factor</a> |
| ecf5   | 63/63 | 100 | 0   | <a href="#">AP012280.1</a> | <i>Pseudomonas aeruginosa</i> NCGM2.S1<br>DNA, <a href="#">RNA polymerase ECF-subfamily sigma-70 factor</a> |
| ecf6   | 61/64 | 95  | 1   | <a href="#">AP012280.1</a> | <i>Pseudomonas aeruginosa</i> NCGM2.S1<br>DNA, <a href="#">RNA polymerase ECF-subfamily sigma-70 factor</a> |
| ecf7   | 62/63 | 98  | 1   | <a href="#">AP012280.1</a> | <i>Pseudomonas aeruginosa</i> NCGM2.S1<br>DNA, <a href="#">RNA polymerase ECF-subfamily sigma-70 factor</a> |
| ecf9   | 62/63 | 98  | 1   | <a href="#">AP012280.1</a> | <i>Pseudomonas aeruginosa</i> NCGM2.S1<br>DNA, <a href="#">RNA polymerase ECF-subfamily sigma-70 factor</a> |
| ecf10  | 65/65 | 100 | 0   | <a href="#">AP012280.1</a> | <i>Pseudomonas aeruginosa</i> NCGM2.S1<br>DNA, <a href="#">RNA polymerase ECF-subfamily sigma-70 factor</a> |
| ecf11  | 64/65 | 98  | 0   | <a href="#">AP012280.1</a> | <i>Pseudomonas aeruginosa</i> NCGM2.S1<br>DNA, <a href="#">RNA polymerase ECF-subfamily sigma-70 factor</a> |
| ecf12  | 63/63 | 100 | 0   | <a href="#">AP012280.1</a> | <i>Pseudomonas aeruginosa</i> NCGM2.S1<br>DNA, <a href="#">RNA polymerase ECF-subfamily sigma-70 factor</a> |
| ecf13  | 65/65 | 100 | 0   | <a href="#">AP012280.1</a> | <i>Pseudomonas aeruginosa</i> NCGM2.S1<br>DNA, <a href="#">RNA polymerase ECF-subfamily sigma-70 factor</a> |
| ecf14  | 65/65 | 100 | 0   | <a href="#">AP012280.1</a> | <i>Pseudomonas aeruginosa</i> NCGM2.S1<br>DNA, <a href="#">RNA polymerase ECF-subfamily sigma-70 factor</a> |
| ecf15  | 69/70 | 99  | 1   | <a href="#">AP012280.1</a> | <i>Pseudomonas aeruginosa</i> NCGM2.S1<br>DNA, <a href="#">RNA polymerase ECF-subfamily sigma-70 factor</a> |

|       |         |     |   |                            |                                                                                                            |
|-------|---------|-----|---|----------------------------|------------------------------------------------------------------------------------------------------------|
|       |         |     |   |                            | <a href="#">sigma-70 factor</a>                                                                            |
| ecf16 | 63/63   | 100 | 0 | <a href="#">AP012280.1</a> | <i>Pseudomonas aeruginosa</i> NCGM2.S1 DNA, <a href="#">RNA polymerase ECF-subfamily sigma-70 factor</a>   |
| ecf17 | 63/63   | 100 | 0 | <a href="#">AP012280.1</a> | <i>Pseudomonas aeruginosa</i> NCGM2.S1 DNA, <a href="#">RNA polymerase ECF-subfamily sigma-70 factor</a>   |
| ecf18 | 62/63   | 99  | 1 | <a href="#">AP012280.1</a> | <i>Pseudomonas aeruginosa</i> NCGM2.S1 DNA, <a href="#">RNA polymerase ECF-subfamily sigma-70 factor</a>   |
| ecf19 | 63/63   | 100 | 0 | <a href="#">AP012280.1</a> | <i>Pseudomonas aeruginosa</i> NCGM2.S1 DNA, <a href="#">RNA polymerase ECF-subfamily sigma-70 factor</a>   |
| ecf20 | 65/65   | 100 | 0 | <a href="#">AP012280.1</a> | <i>Pseudomonas aeruginosa</i> NCGM2.S1 DNA, <a href="#">RNA polymerase ECF-subfamily sigma-70 factor</a>   |
| gyr1  | 70/79   | 89  | 0 | <a href="#">AP012224.1</a> | <i>Pseudogulbenkiania</i> sp. NH8B DNA, <a href="#">DNA protecting protein DprA</a>                        |
| gyr2  |         |     |   |                            | No match                                                                                                   |
| gyr3  |         |     |   |                            | No match                                                                                                   |
| gyr4  |         |     |   |                            | No match                                                                                                   |
| gyr5  | 70/79   | 89  | 0 | <a href="#">AP012224.1</a> | <i>Pseudogulbenkiania</i> sp. NH8B DNA, <a href="#">DNA protecting protein DprA</a>                        |
| gyr6  | 222/222 | 100 | 0 | <a href="#">CP002496.1</a> | <i>Pseudomonas aeruginosa</i> M18, complete genome, <a href="#">DNA gyrase subunit B</a>                   |
| gyr7  | 291/328 | 89  | 0 | <a href="#">CP000356.1</a> | <i>Sphingopyxis alaskensis</i> RB2256, <a href="#">phosphoribosylformylglycinamide synthase subunit II</a> |
| gyr8  | 70/79   | 89  | 0 | <a href="#">AP012224.1</a> | <i>Pseudogulbenkiania</i> sp. NH8B DNA, <a href="#">DNA protecting protein DprA</a>                        |
| gyr9  |         |     |   |                            | No match                                                                                                   |
| gyr10 | 133/156 | 85  | 0 | <a href="#">CP002417.1</a> | <i>Variovorax paradoxus</i> EPS, <a href="#">major facilitator superfamily MFS_1</a>                       |
| gyr11 | 141/166 | 85  | 1 | <a href="#">CP002417.1</a> | <i>Variovorax paradoxus</i> EPS, <a href="#">major facilitator superfamily MFS_1</a>                       |
| gyr13 |         |     |   |                            | No match                                                                                                   |
| gyr14 | 139/163 | 85  | 1 | <a href="#">CP002417.1</a> | <i>Variovorax paradoxus</i> EPS, <a href="#">major facilitator superfamily MFS_1</a>                       |



|       |         |    |    |                            |                                                                                                                                               |
|-------|---------|----|----|----------------------------|-----------------------------------------------------------------------------------------------------------------------------------------------|
| gyr15 | 139/163 | 85 | 1  | <a href="#">CP002417.1</a> | <i>Variovorax paradoxus</i> EPS, <a href="#">major facilitator superfamily MFS_1</a>                                                          |
| gyr17 | 187/218 | 86 | 16 | <a href="#">AP012206.1</a> | <i>Bradyrhizobium j. aponicum</i> USDA 6 DNA, <a href="#">glucarate dehydratase</a><br><a href="#">5-dehydro-4-deoxyglucarate dehydratase</a> |
| gyr18 | 70/79   | 89 | 0  | <a href="#">AP012224.1</a> | <i>Pseudogulbenkiania</i> sp. NH8B DNA, <a href="#">DNA protecting protein DprA</a>                                                           |
| gyr20 | 70/79   | 89 | 0  | <a href="#">AP012224.1</a> | <i>Pseudogulbenkiania</i> sp. NH8B DNA, <a href="#">DNA protecting protein DprA</a>                                                           |

Note: Sequencing of ecf8, gyr16 and gyr19 failed. gyr12 is an empty vector without insert. q-PCR results of the M13 PCR products of gyr clones demonstrated that only gyr6 has amplification, indicating that the specificity of gyrB q-PCR assay strongly relied on the probe.

**Table S8 Blast results for *M. avium* q-PCR**

| <b>Sample</b> | <b>bp</b> | <b>%</b> | <b>gap</b> | <b>Acc #</b>               | <b>Highest similarity</b>                                                     |
|---------------|-----------|----------|------------|----------------------------|-------------------------------------------------------------------------------|
| MAC1          | 189/191   | 99       | 0          | <a href="#">JN899580.1</a> | <i>Mycobacterium avium</i> strain E6 16S ribosomal RNA gene, partial sequence |
| MAC2          | 189/191   | 99       | 0          | <a href="#">JN899580.1</a> | <i>Mycobacterium avium</i> strain E6 16S ribosomal RNA gene, partial sequence |
| MAC3          | 191/191   | 100      | 0          | <a href="#">JN899580.1</a> | <i>Mycobacterium avium</i> strain E6 16S ribosomal RNA gene, partial sequence |
| MAC4          | 186/187   | 99       | 0          | <a href="#">JN899580.1</a> | <i>Mycobacterium avium</i> strain E6 16S ribosomal RNA gene, partial sequence |
| MAC5          | 190/193   | 98       | 1          | <a href="#">JN899580.1</a> | <i>Mycobacterium avium</i> strain E6 16S ribosomal RNA gene, partial sequence |
| MAC6          | 187/187   | 100      | 1          | <a href="#">JN899580.1</a> | <i>Mycobacterium avium</i> strain E6 16S ribosomal RNA gene, partial sequence |
| MAC7          | 190/193   | 98       | 1          | <a href="#">JN899580.1</a> | <i>Mycobacterium avium</i> strain E6 16S ribosomal RNA gene, partial sequence |
| MAC8          | 186/187   | 98       | 1          | <a href="#">JN899580.1</a> | <i>Mycobacterium avium</i> strain E6 16S ribosomal RNA gene, partial sequence |
| MAC9          | 192/193   | 99       | 1          | <a href="#">JN899580.1</a> | <i>Mycobacterium avium</i> strain E6 16S ribosomal RNA gene, partial sequence |
| MAC10         | 189/191   | 99       | 1          | <a href="#">JN899580.1</a> | <i>Mycobacterium avium</i> strain E6 16S ribosomal RNA gene, partial sequence |
| MAC11         | 187/187   | 100      | 0          | <a href="#">JN899580.1</a> | <i>Mycobacterium avium</i> strain E6 16S ribosomal RNA gene, partial sequence |
| MAC12         | 191/191   | 100      | 0          | <a href="#">JN899580.1</a> | <i>Mycobacterium avium</i> strain E6 16S ribosomal RNA gene, partial sequence |
| MAC13         | 191/191   | 100      | 0          | <a href="#">JN899580.1</a> | <i>Mycobacterium avium</i> strain E6 16S ribosomal RNA gene, partial sequence |
| MAC14         | 190/193   | 98       | 1          | <a href="#">JN899580.1</a> | <i>Mycobacterium avium</i> strain E6 16S ribosomal RNA gene, partial sequence |
| MAC15         | 193/193   | 100      | 0          | <a href="#">JN899580.1</a> | <i>Mycobacterium avium</i> strain E6 16S ribosomal RNA gene, partial sequence |
| MAC16         | 192/194   | 99       | 1          | <a href="#">JN899580.1</a> | <i>Mycobacterium avium</i> strain E6 16S ribosomal RNA gene, partial sequence |
| MAC17         | 185/187   | 99       | 0          | <a href="#">JN899580.1</a> | <i>Mycobacterium avium</i> strain E6 16S ribosomal RNA gene, partial sequence |
| MAC18         | 190/191   | 99       | 0          | <a href="#">JN899580.1</a> | <i>Mycobacterium avium</i> strain E6 16S ribosomal RNA gene, partial sequence |
| MAC19         | 191/191   | 100      | 0          | <a href="#">JN899580.1</a> | <i>Mycobacterium avium</i> strain E6 16S ribosomal RNA gene, partial sequence |
| MAC20         | 189/191   | 99       | 0          | <a href="#">JN899580.1</a> | <i>Mycobacterium avium</i> strain E6 16S ribosomal RNA gene, partial sequence |

|       |         |     |   |                            |                                                                               |
|-------|---------|-----|---|----------------------------|-------------------------------------------------------------------------------|
| MAC21 | 190/191 | 99  | 0 | <a href="#">JN899580.1</a> | <i>Mycobacterium avium</i> strain E6 16S ribosomal RNA gene, partial sequence |
| MAC22 | 189/191 | 99  | 0 | <a href="#">JN899580.1</a> | <i>Mycobacterium avium</i> strain E6 16S ribosomal RNA gene, partial sequence |
| MAC23 | 193/193 | 100 | 0 | <a href="#">JN899580.1</a> | <i>Mycobacterium avium</i> strain E6 16S ribosomal RNA gene, partial sequence |
| MAC24 | 192/193 | 99  | 1 | <a href="#">JN899580.1</a> | <i>Mycobacterium avium</i> strain E6 16S ribosomal RNA gene, partial sequence |
| MAC25 | 193/193 | 100 | 0 | <a href="#">JN899580.1</a> | <i>Mycobacterium avium</i> strain E6 16S ribosomal RNA gene, partial sequence |

## Comparison of Recovery Efficiency and Limit of Quantification Using Culture and qPCR

Cultures of *L. pneumophila*, *M. avium*, *A. polyphage*, and *H. vermiformis* of known concentrations were serially diluted into 500 ml autoclaved drinking water, which were subjected to membrane filtering concentration using 0.22  $\mu\text{m}$ -pore-size mixed cellulose ester filters (Millipore, Billerica, MA). The membranes were subsequently fragmented and subjected to DNA extraction using a FastDNA<sup>®</sup> SPIN Kit (MP Biomedicals, Solon, OH) according to manufacturer protocol. The relationship between q-PCR and culturing are provided in Figure S1. The limit of quantitation was defined as the lowest detectable concentration with three positive threshold cycle (Ct) reading. The detection limit in 500 ml water samples for *Legionella* spp., *L. pneumophila*, *Mycobacterium* spp., *M. avium*, *P. aeruginosa*, *Acanthamoeba* spp. and *H. vermiformis* were reported to be 32, 32, 170, 170, 114, 0.85, 2.4 CFU or cells/ml. Regression analysis were performed between log (gene copies/ml) and log (CFU or cells/ml). The model equations are summarized in Table S9.

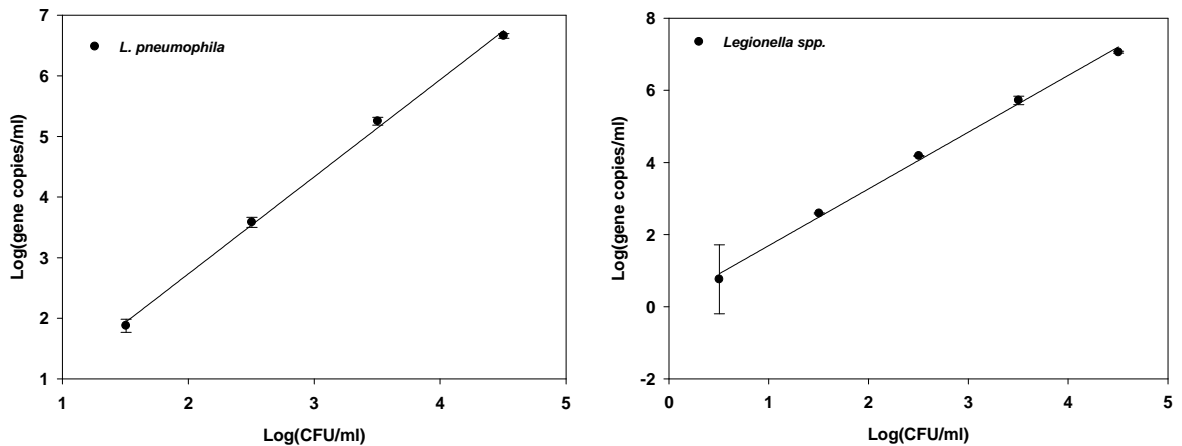

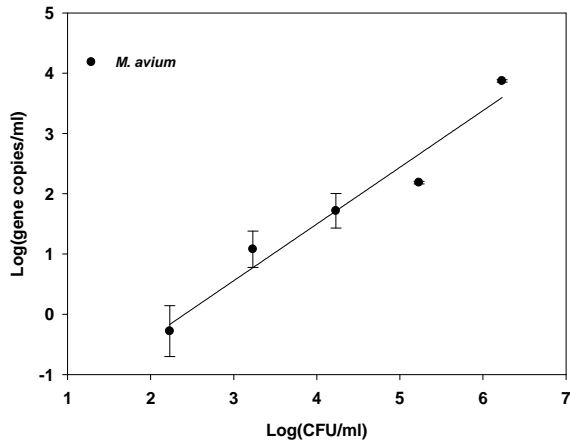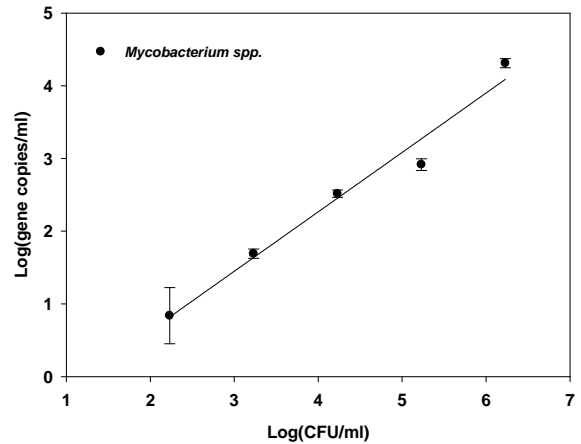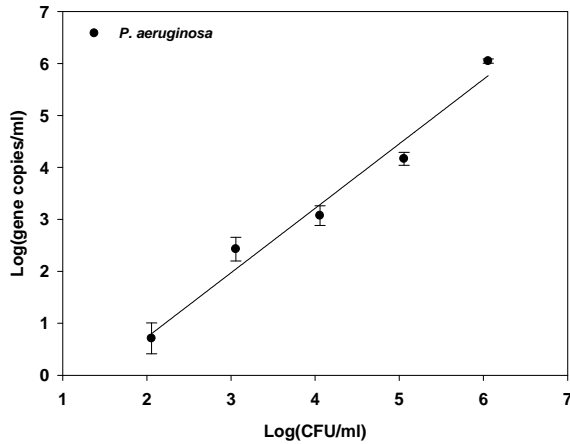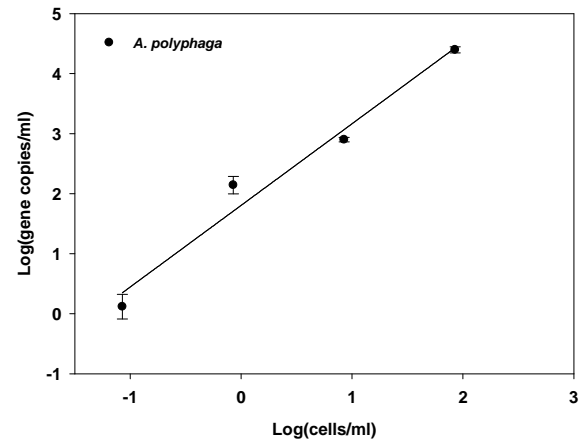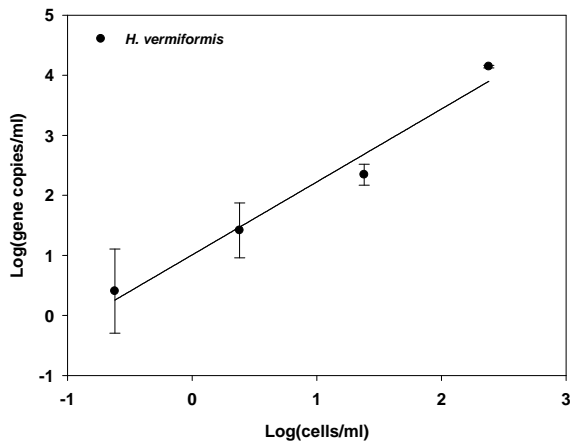

**Table S9 Regression analysis of q-PCR and culturing data**

| Targeted organisms        | Model Equation | R <sup>2</sup> |
|---------------------------|----------------|----------------|
| <i>Legionella</i> spp.    | Y=1.4X+0.6     | 0.9968         |
| <i>L. pneumophila</i>     | Y=1.6X+0.1     | 0.9981         |
| <i>Mycobacterium</i> spp. | Y=0.8X-1.0     | 0.9734         |
| <i>M. avium</i>           | Y=0.9X-2.3     | 0.9565         |
| <i>P. aeruginosa</i>      | Y=1.2X-1.8     | 0.9740         |
| <i>Acanthamoeba</i> spp.  | Y=1.4X+1.8     | 0.9715         |
| <i>H. vermiformis</i>     | Y=1.2X+1.0     | 0.9734         |

Note: Y=log (gene copies/ml)

X=log (CFU or cells/ml)

**Figure S1 Enumeration of microbial targets in serial dilutions via culturing versus qPCR.**

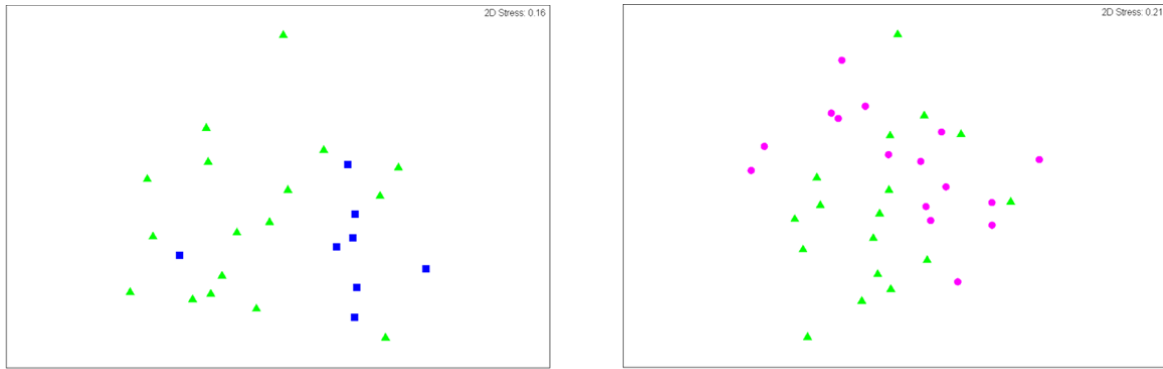

**Figure S2** Multi-dimensional scaling analysis of bacterial community composition (T-RFLP profiles) for samples from BCV with different water age. Green triangle symbols represent samples with water age of 10-12 d. Blue square symbols represent samples with water age of 3-6d. Pink round symbols represent sample with water age of 8-10d. Note: samples without T-RFLP peaks were excluded from analysis.

### Supplemental References

1. Anuj SN, Whiley DM, Kidd TJ, Bell SC, Wainwright CE, Nissen MD, Sloots TP. 2009. Identification of *Pseudomonas aeruginosa* by a duplex real-time polymerase chain reaction assay targeting the *ecfX* and the *gyrB* genes. *Diagn. Microbiol. Infect. Dis.* 63:127-131.
2. Kuiper MW, Valster RM, Wullings BA, Boonstra H, Smidt H, van der Kooij D. 2006. Quantitative detection of the free-living amoeba *Hartmannella vermiformis* in surface water by using real-time PCR. *Appl. Environ. Microbiol.* 72:5750-5756.
3. Nazarian EJ, Bopp DJ, Saylor A, Limberger RJ, Musser KA. 2008. Design and implementation of a protocol for the detection of *Legionella* in clinical and environmental samples. *Diagn. Microbiol. Infect. Dis.* 62:125-132.
4. Radomski N, Lucas FS, Moilleron R, Cambau E, Haenn S, Moulin L. 2010. Development of a Real-Time qPCR Method for Detection and Enumeration of *Mycobacterium* spp. in Surface Water. *Appl. Environ. Microbiol.* 76:7348-7351.
5. Riviere D, Szczebara FM, Berjeaud JM, Frere J, Hechard Y. 2006. Development of a real-time PCR assay for quantification of *Acanthamoeba* trophozoites and cysts. *J. Microbiol. Methods* 64:78-83.
6. Suzuki MT, Taylor LT, DeLong EF. 2000. Quantitative analysis of small-subunit rRNA genes in mixed microbial populations via 5'-nuclease assays. *Appl. Environ. Microbiol.* 66:4605-4614.
7. Wilton S, Cousins D. 1992. Detection and identification of multiple mycobacterial pathogens by DNA amplification in a single tube. *Genome Res.* 1:269-273.
